## OPINION

# The challenge of border carbon adjustments as a mechanism for climate clubs

Jennifer Winter \*

University of Calgary, Calgary, Canada

\* [jwinter@ucalgary.ca](mailto:jwinter@ucalgary.ca)

## Introduction

At the G7 leaders' summit in June 2022, the G7 committed to establishing a climate club. The rationale is supporting “effective implementation of the Paris Agreement by accelerating climate action and increasing ambition”, and importantly references advancing climate policy transparency with a focus on industry to mitigate carbon leakage [1]. Nordhaus argues that a climate club with “penalties for non-members” is the most effective way to overcome the collective action problem in addressing climate change and substantially reduce emissions [2]. Following the European Union announcing it would transition from its emissions trading system to a carbon border adjustment mechanism (CBAM), there were calls for the CBAM to be the building block of a climate club, with a minimum common price and common border tariffs for countries outside the club [3,4]. Others argue carbon clubs are counter-productive [5]. With both moving to implementation, I focus on the pros and cons of border carbon adjustments (BCAs) in meeting the G7 climate club goals.

## Addressing leakage

Carbon leakage occurs when economic activity leaves or “leaks” from a country with more stringent environmental policy, to jurisdictions with less stringency. The net effect is lost economic activity with no or little reduction in global emissions. Of several leakage channels, the most politically sensitive is competitiveness [6]. Emissions pricing reduces domestic firms' competitiveness domestically (output becomes relatively higher-cost than imports) and internationally (exports are now higher cost). Negative competitiveness effects also depend on exposure to leakage—the emissions embodied in trade, and whether domestic industries are net importers or net exporters of emissions. While evidence of leakage is mixed [6,7], disparity in global prices (Fig 1) and pricing coverage creates scope for leakage [8].

Numerous jurisdictions use domestic policy to lower the cost of emissions pricing via free permit allocations or output-based subsidies, lowering average costs while maintaining the marginal price [9,10]. An alternative is border carbon adjustments, brought into sharp focus by the European Union's proposal.

The two approaches have different effects in mitigating leakage [8]. Domestic policy that lowers the average cost of emissions for domestic firms maintains domestic and international competitiveness (costs are lower regardless of the buyer). Border carbon adjustments price international production at the point of import. This levels the playing field domestically but does not protect domestic firms' international competitiveness unless combined with export rebates. As G7 countries are net emissions-importers and have high leakage exposure [8], BCAs may be increasingly attractive.

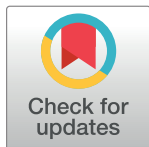

## OPEN ACCESS

**Citation:** Winter J (2023) The challenge of border carbon adjustments as a mechanism for climate clubs. *PLOS Clim* 2(2): e0000135. <https://doi.org/10.1371/journal.pclm.0000135>

**Editor:** Jamie Males, PLOS Climate, UNITED KINGDOM

**Published:** February 13, 2023

**Copyright:** © 2023 Jennifer Winter. This is an open access article distributed under the terms of the [Creative Commons Attribution License](https://creativecommons.org/licenses/by/4.0/), which permits unrestricted use, distribution, and reproduction in any medium, provided the original author and source are credited.

**Funding:** The author received no specific funding for this work.

**Competing interests:** The authors have declared that no competing interests exist.

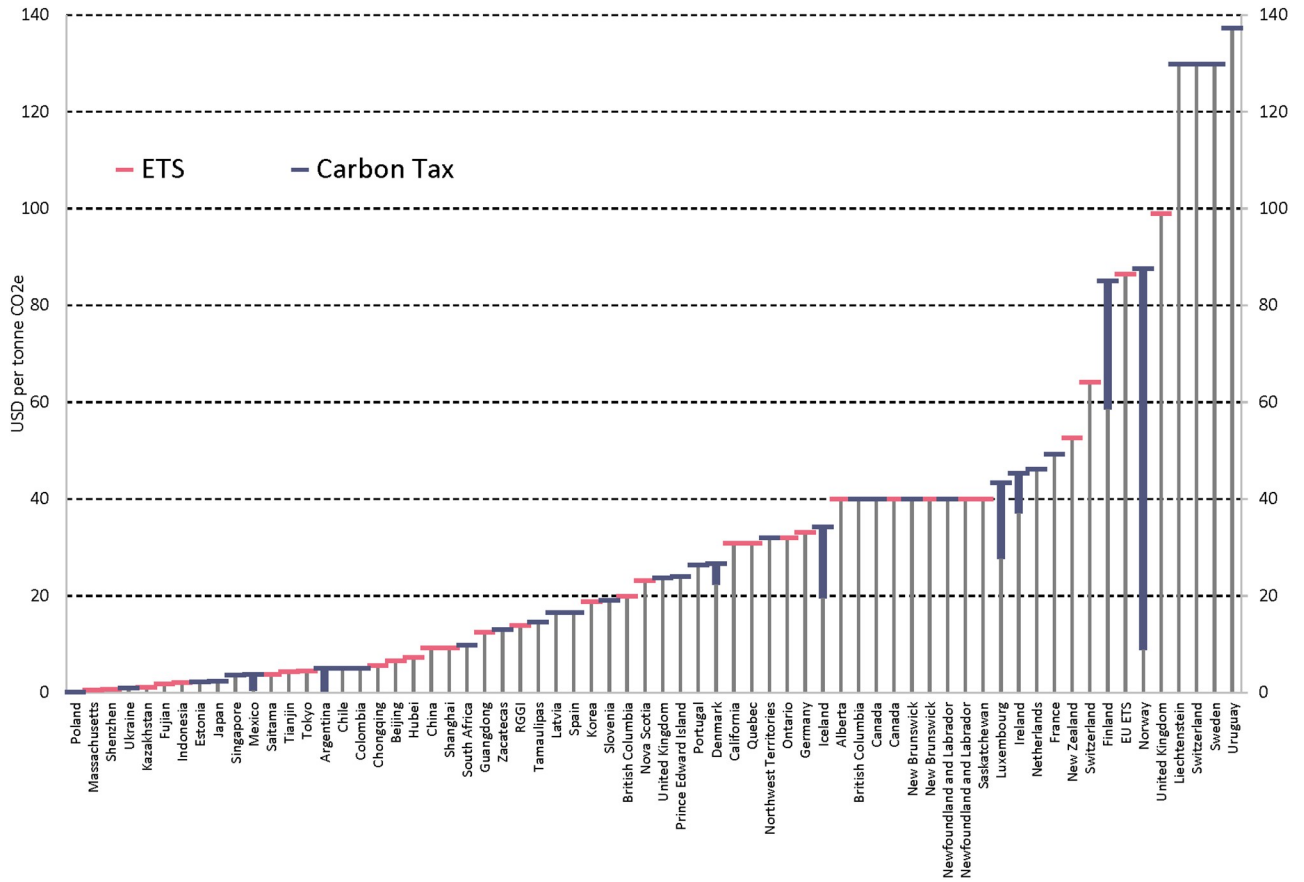

Fig 1. 2022 Emissions prices by jurisdiction and type. Source: The World Bank (2022). Carbon Pricing Dashboard.

<https://doi.org/10.1371/journal.pclm.0000135.g001>

### BCAs, climate clubs, and implementation challenges

There are five implementation challenges in using BCAs as a climate club enforcement mechanism. First, Paris Agreement Article 2 enshrines the concept of common but differentiated responsibilities for signatories’ mitigation actions. BCAs, by taxing imports based on their emissions content, effectively offshores price-based climate policy to countries with less-stringent or unrecognized climate policy. Developing countries have more emissions intensive production and less stringent environmental policies due to their developing status [7,11]. BCAs shift the burden of emissions reductions to less-developed countries, an action inconsistent with Article 2, while exemptions would undermine the efficiency and effectiveness of the BCA.

Second, not all sectors or products are equally at risk of leakage; emissions reductions and the cost-effectiveness of reductions are decreasing in the number of products included [6,12]. The EU CBAM proposal includes five sectors, with plans to expand further [13]. Broader scope increases burden-shifting [11], while smaller scope limits the effectiveness of the climate club in incentivizing non-member actions.

Third, and relatedly, is determining the border adjustment factors: the tax rate on imports’ embodied emissions. Important design features are types and scope of emissions included, products’ domestic emissions benchmark, and accounting for differences in importers’ emissions intensities. The most important is the domestic benchmark: a weak benchmark provides little incentive for emissions reductions outside the club, and a strong benchmark burden-shifts.

The simplest option is to only tax direct production emissions. A more complex system involves including indirect emissions (Scope 2 and 3), which also requires determining how far up the supply chain to go when including indirect emissions. Excluding indirect emissions means a share of total production emissions are unpriced. In contrast, including indirect emissions increases the complexity of calculating the adjustment factor, introducing a trade-off between accurately pricing emissions and administrative complexity. Including indirect emissions will increase burden-shifting. Border adjustment factors could include uniform treatment of imports, country-specific benchmarks, or firm-specific verification. Verification processes create an incentive for emissions reductions, but again increase complexity of maintaining the BCA. Moreover, WTO compatibility requires equal treatment of third countries [6,13]. Nordhaus proposes uniform tariffs, rather than product-specific duties due to their complexity [2].

The fourth challenge is whether member countries will use export rebates to preserve international competitiveness. The EU CBAM proposal does not include export rebates, but there is lobbying to include them [13]. Moreover, Canada and Japan currently have competitiveness-mitigation mechanisms in place, and a focus of the club is mitigating leakage. Expanding the club outside the G7 may require export rebates, though this may spur additional criticism of the climate club.

Fifth is treatment of domestic pricing and non-pricing policies. BCAs potentially disadvantage non-pricing policy due to the challenges of calculating an equivalent price for regulatory actions. However, the G7 statement explicitly allows for “explicit carbon pricing, other carbon mitigation approaches and carbon intensities” [1]. Lowering the BCA in response to domestic climate policies may incentivize other countries to adopt pricing or increase the stringency of non-pricing policies. Accounting for differing effective price levels and emissions coverage makes adjustments like this challenging, particularly as there are likely policy differences within the club. This will be particularly problematic for US, the only G7 country without pricing.

## Conclusions

The G7 commitment to a climate club is an interesting step in the evolution of cooperative climate policy amidst concern about leakage. The EU CBAM offers a roadmap for an enforcement mechanism, but enforcing a climate club using border carbon adjustments magnifies the challenges of unilateral BCA design and implementation. Given these challenges, in the near term it appears any climate club will be less mechanism-based, and more focused on gradual alignment [14].

## References

1. G7. G7 Statement on Climate Club [Internet]. Elmau, Germany: G7 Germany; [cited 2022 Aug 7]. <https://www.g7germany.de/resource/blob/974430/2057926/2a7cd9f10213a481924492942dd660a1/2022-06-28-g7-climate-club-data.pdf?download=1>.
2. Nordhaus W. Climate Clubs: Overcoming Free-riding in International Climate Policy. *American Economic Review*. 2015 Apr 1; 105(4):1339–70.
3. Bierbrauer F, Felbermayr G, Ockenfels A, Schmidt KM, Südekum J. A CO<sub>2</sub>-border adjustment mechanism as a building block of a climate club. Kiel: Kiel Institute for the World Economy (IfW); 2021 p. 30. (Kiel Policy Brief). Report No.: 151.
4. Mathieu (ed.) C, Barichella A, de Perthuis C, Nagashima M, Tu K. Can the Biggest Emitters Set Up a Climate Club? A Review of International Carbon Pricing Debates [Internet]. Paris: French Institute of International Relations; 2021 Jun [cited 2022 Aug 22]. (Études de l'Ifri). <https://www.ifri.org/en/publications/etudes-de-lifri/can-biggest-emitters-set-climate-club-review-international-carbon>.

5. Lee B, Baron R. Why the EU's proposed carbon border must not be used to launch a carbon club [Internet]. World Economic Forum Agenda articles. 2021 [cited 2022 Aug 22]. Available from: <https://www.weforum.org/agenda/2021/06/eu-carbon-border-clubs-climate-cbam/>.
6. Cosbey A, Droege S, Fischer C, Munnings C. Developing Guidance for Implementing Border Carbon Adjustments: Lessons, Cautions, and Research Needs from the Literature. *Review of Environmental Economics and Policy*. 2019 Jan 1; 13(1):3–22.
7. Böhringer C, Fischer C, Rosendahl KE, Rutherford TF. Potential impacts and challenges of border carbon adjustments. *Nat Clim Chang*. 2022 Jan 3; 12:22–29.
8. Winter J. Mercados de emisiones y comercio internacional [Emissions markets and international trade]. In: *Energía y Geoestrategia 2022 [Energy and Geostrategy 2022]* [Internet]. 10th ed. Spanish Institute for Strategic Studies, Ministry of Defence, Spanish Energy Club and the Spanish Committee of the World Energy Council; 2022 [cited 2022 Aug 30]. (Energía y Geoestrategia; vol. 1). <https://www.ieee.es/en/publicaciones-new/energia-y-geoestrategia/2022/ENEGEOES2022.html>.
9. Dobson S, Winter J. Assessing Policy Support for Emissions Intensive and Trade Exposed Industries. The School of Public Policy Publications. 2018 Oct 25; 11.
10. World Bank. State and Trends of Carbon Pricing 2022 [Internet]. Washington, DC: World Bank; 2022 May [cited 2022 Aug 22]. <https://openknowledge.worldbank.org/handle/10986/37455>.
11. Böhringer C, Carbone JC, Rutherford TF. Embodied Carbon Tariffs. *The Scandinavian Journal of Economics*. 2018; 120(1):183–210.
12. Böhringer C, Carbone JC, Rutherford TF. Unilateral climate policy design: Efficiency and equity implications of alternative instruments to reduce carbon leakage. *Energy Economics*. 2012 Dec 1; 34:S208–17.
13. Titievskaja J, Morgado Simões H, Dobrev A. EU carbon border adjustment mechanism: Implications for climate and competitiveness [Internet]. European Parliamentary Research Service; 2022 Jul p. 11. ( Briefing: EU Legislation in Progress). Report No.: 3rd edition. <https://epthinktank.eu/2022/01/24/eu-carbon-border-adjustment-mechanism-implications-for-climate-and-competitiveness-eu-legislation-in-progress/>.
14. Stern N, Lankes HP, Bhattacharya A, Kyriakopoulou D, Macquarie R, Pierfederici R, et al. Collaborating and Delivering on Climate Action through a Climate Club: An independent report to the G7 [Internet]. London: London School of Economics and Political Science; 2022 Oct [cited 2022 Nov 30]. <https://www.lse.ac.uk/granthaminstitute/wp-content/uploads/2022/10/Collaborating-and-delivering-on-climate-action-through-a-Climate-Club.pdf>.
